# Supplementary material for: Risk of Dementia Diagnosis After Injurious Falls in Older Adults
Source: PubMed Central journal article supplement (PMC11443352; doi:10.1001/jamanetworkopen.2024.36606), 2024-09-30
Supplement: jamanetwopen-e2436606-s001.pdf [file jamanetwopen-e2436606-s001.pdf]

## Supplemental Online Content

Ordoobadi AJ, Dhanani H, Tulebaev SR, Salim A, Cooper Z, Jarman MP. Risk of dementia diagnosis after injurious falls in older adults. *JAMA Netw Open*. 2024;7(9):e2436606. doi:10.1001/jamanetworkopen.2024.36606

**eTable 1.** National Trauma Data Standard ICD-9 and ICD-10 Codes for Identifying Traumatic Injuries

**eTable 2.** ICD-9 Codes Used to Identify Dementia Diagnoses

**eTable 3.** Other Mechanisms of Injury

This supplemental material has been provided by the authors to give readers additional information about their work.

**eTable 1:** National Trauma Data Standard ICD-9 and ICD-10 Codes for Identifying Traumatic Injuries\*

|               | <b>Included Codes</b>                              | <b>Excluded</b>                                                                                                            |
|---------------|----------------------------------------------------|----------------------------------------------------------------------------------------------------------------------------|
| <b>ICD-9</b>  | 800-959.9<br>905-909<br>910-924<br>930-939         | Superficial Injury (905-909.9, 910-924.9, 930-939.9)<br>Foreign Body in Orifice<br>Late Effects of Injury                  |
| <b>ICD-10</b> | S00-S99<br>T07<br>T14<br>T20-T28<br>T30-T32<br>T79 | Superficial Injury (S00, S10, S20, S30, S40, S50, S60, S70, S80, S90)<br>Foreign Body in Orifice<br>Late Effects of Injury |

Abbreviations: ICD-9, International Classification of Diseases, Ninth Revision; ICD-10, International Statistical Classification of Diseases and Related Health Problems, Tenth Revision.

\*Table adapted from: Jarman MP, Jin G, Weissman JS, et al. Association of Trauma Center Designation With Postdischarge Survival Among Older Adults With Injuries. *JAMA Netw Open.* 2022;5(3):e222448. doi:10.1001/jamanetworkopen.2022.2448

**eTable 2:** ICD-9 Codes Used to Identify Dementia Diagnoses

|               | <b>Included Codes</b>                                                                                                                                                                             |
|---------------|---------------------------------------------------------------------------------------------------------------------------------------------------------------------------------------------------|
| <b>ICD-9*</b> | 331.0<br>331.1<br>331.2<br>331.7<br>290.0<br>290.1<br>290.10<br>290.11<br>290.12<br>290.13<br>290.20<br>290.21<br>290.3<br>290.40<br>290.41<br>290.42<br>290.43<br>294.0<br>294.1<br>294.8<br>797 |
| <b>ICD-10</b> | <i>Consists of the above ICD-9 codes converted through general equivalence mapping to ICD-10 codes</i>                                                                                            |

Abbreviations: ICD-9, International Classification of Diseases, Ninth Revision; ICD-10, International Statistical Classification of Diseases and Related Health Problems, Tenth Revision.

\*Included ICD-9 codes are from: Taylor DH, Østbye T, Langa KM, Weir D, Plassman BL. The accuracy of Medicare claims as an epidemiological tool: the case of dementia revisited. *J Alzheimers Dis JAD*. 2009;17(4):807-815. doi:10.3233/JAD-2009-1099.

**eTable 3:** Other mechanisms of injury

| <b>Mechanism*</b>     | <b>Events, n (%)</b> |
|-----------------------|----------------------|
| Fall                  | 1,228,847 (50)       |
| Unspecified/other     | 784,286 (32)         |
| Cut/pierce            | 112,167 (4.6)        |
| Overexertion          | 96,351 (3.9)         |
| Struck by/against     | 93,869 (3.8)         |
| All transport         | 78,503 (3.2)         |
| Natural/environmental | 37,894 (1.5)         |
| Machinery             | 10,785 (0.4)         |
| Fire/burn             | 7,803 (0.3)          |
| Firearm               | 1,476 (0.06)         |
| Poisoning             | 1,234 (0.05)         |
| Suffocation           | 250 (0.01)           |
| Drowning              | 190 (0.01)           |

\*Categorization of mechanism of injury is based on Centers for Disease Control and Prevention ICD Injury Code Matrices.<sup>1,2</sup>

#### References

1. Hedegaard H, Johnson RL, Garnett MF, Thomas KE. The International Classification of Diseases, 10th Revision, Clinical Modification (ICD-10-CM) external cause-of-injury framework for categorizing mechanism and intent of injury. National Health Statistics Reports; no 136. Hyattsville, MD: National Center for Health Statistics. 2019. Available from: <https://www.cdc.gov/nchs/data/nhsr/nhsr136-508.pdf>
2. Centers for Disease Control and Prevention. Recommended framework for presenting injury mortality data. MMWR 46(RR14):1-30. 1997. Available from: <https://www.cdc.gov/mmwr/preview/mmwrhtml/00049162.htm>.
